# Supplementary material
Source: PubMed Central journal article supplement (PMC3719828)
Supplement: JVI.01020-13_zjv999097885so1.pdf [file JVI.01020-13_zjv999097885so1.pdf]

## **Supplemental material**

### **Supplemental Tables S1-S5**

## Supplementary Tables

**Table S1. Primers for amplification of SIRV2 ORFs for yeast two-hybrid screen**

|                     |                                         |
|---------------------|-----------------------------------------|
| SIRV2ORF83aF        | CACCATGAAAGTCGAGAGATACAAATG             |
| SIRV2ORF119aF       | CACCATGCACATATGTAAAAGTGGTGAG            |
| SIRV2ORF103aF       | CACCATGAAAAAGATGAAATTCGAAACGT           |
| SIRV2ORF90F         | CACCATGGATGAAGATCTTTTAGTTGAAG           |
| SIRV2ORF109F        | CACCATGAATGTAGAAAATCAAGTAG              |
| SIRV2ORF116F        | CACCATGAGAAATATGGGCTATCAATATA           |
| SIRV2ORF131aF       | CACCATGAGTCAAAAAGTCGAATTTCC             |
| SIRV2ORF103bF       | CACCATGAGTTTTTCGTATATATCAATTAGTG        |
| SIRV2ORF111F        | CACCATGAGGAGAAAATTAGGAAAAGAC            |
| SIRV2ORF105aF       | CACCATGGAATTTGAAGATTTAGATGTAG           |
| SIRV2ORF62aF        | CACCATGAAGATTCTAGTAGATAATG              |
| SIRV2ORF102F        | CACCATGATTTTCAATTCGCCAATTGTTC           |
| SIRV2ORF310F        | CACCATGAAATTAGTATTTGAAATAACATC          |
| SIRV2ORF399F        | CACCATGGAATTCGAAAGAAAAAGTTCTG           |
| SIRV2ORF56bF        | CACCATGCAAACCTCAAGAACAATCTAAAC          |
| SIRV2ORF119cF       | CACCATGGATTTGAAAAAAGTTTTAAATTTTC        |
| SIRV2ORF119cF-TRUNC | CACCATGGATACTGAAAAAATTTTTAAAAAATTTTCGAC |
| SIRV2ORF131bF       | CACCATGGCCTCATTAAAACAATAATAG            |
| SIRV2ORF436F        | CACCATGAGTGAAAAACACACAAC                |
| SIRV2ORF207F        | CACCATGGTAAATATGAATTATGAAG              |
| SIRV2ORF84aF        | CACCATGAGGAATATGAGTCAAATAGAAG           |
| SIRV2ORF59bF        | CACCATGATGAAGATTATTACATTTAAAATTCC       |
| SIRV2ORF91F         | CACCATGACTGATTATAAAAACGGAATAAAG         |
| SIRV2ORF158bF       | CACCATGATTTTATCAGATAGAG                 |
| SIRV2ORF103cF       | CACCATGGAAATTGATCTAAAGAATGAATGTAG       |
| SIRV2ORF76F         | CACCATGCATATCTTTGTGAATAACTTCTTG         |
| SIRV2ORF134F        | CACCATGGCAAAGGTCACACATCAAG              |
| SIRV2ORF55F         | CACCATGGCACTATTAGGATATGAATGTC           |
| SIRV2ORF335F        | CACCATGAAAACCTGCAATTTAACTATG            |
| SIRV2ORF156F        | CACCATGGTAGCTAAAGGATTTTATATGTG          |
| SIRV2ORF64F         | CACCATGATATCTTATTATTATGATGAAAAAG        |
| SIRV2ORF84cF        | CACCATGAATTATCTGAGGAGGAAAGTG            |
| SIRV2ORF84cF-TRUNC  | CACCATGAAAATTAAGCAAGCATTAAAAG           |
| SIRV2ORF110F        | CACCATGAAAATTGAAGATCCTTTTC              |
| SIRV2ORF488F        | CACCATGACACTGTATGACATTTATATAC           |
| SIRV2ORF154F        | CACCATGAATCCAAAATATGAAATTGAAG           |
| SIRV2ORF121F        | CACCATGAACATTAGACAATCCG                 |
| SIRV2ORF69F         | CACCATGTCAGAGCAAAAAGAGAAG               |
| SIRV2ORF114F        | CACCATGAATAAAGTCTATTTGGCAAATG           |
| SIRV2ORF1070F       | CACCATGTTTATAATTTTGAAAAGAAAC            |

|                    |                                     |
|--------------------|-------------------------------------|
| SIRV2ORF564F       | CACCATGATATATTATATCATGCCTTTAC       |
| SIRV2ORF309F       | CACCATGTCTTCAACTTGTAATCCAATTAC      |
| SIRV2ORF158aF      | CACCATGAATTATGATGATTATTTTTG         |
| SIRV2ORF269F       | CACCATGAGTGTAACCTTATACTTCAATTC      |
| SIRV2ORF269F-TRUNC | CACCATGAATACTTTAAATAAGTTAACAC       |
| SIRV2ORF176F       | CACCATGAAAATTTTCACTTTCGTAGG         |
| SIRV2ORF356F       | CACCATGCAAAAACTATTTTCTATGTC         |
| SIRV2ORF94F        | CACCATGGTGAAAAAATGGAGTTTGAAG        |
| SIRV2ORF95F        | CACCATGAATTTGAAAAAAGTTAAACGAATTATAG |
| SIRV2ORF112F       | CACCATGAGTTTTTATATAATGTATATTAAGGTG  |
| SIRV2ORF249F       | CACCATGGAGGTAAACAGATAAAGAAG         |
| SIRV2ORF98F        | CACCATGGCTATAACATTATTAGAAGGAG       |
| SIRV2ORF98F-TRUNC  | CACCATGGGAGAAATTGTCCACTTATATAATG    |
| SIRV2ORF73F        | CACCATGTTTTTTGAAGATTCTAATATACAAG    |
| SIRV2ORF108F       | CACCATGGGGAAAAAATGGATGATATAC        |
| SIRV2ORF105bF      | CACCATGATAGATGAAAAGGCACAAG          |
| SIRV2ORF119bF      | CACCATGCACATATGTAAAAGTGAGG          |
| SIRV2ORF83bF       | CACCATGAAAGTCGAGAGATACAAATG         |

|                   |                                |
|-------------------|--------------------------------|
| SIRV2ORF83aR      | CTAACAACTCTCCAAATATCTCCTA      |
| SIRV2ORF119aR     | TTAATGATACTTAATCATTTC AAC      |
| SIRV2ORF103aR     | TTACTTTTTGACTTTTCTCCAGAAATG    |
| SIRV2ORF90R       | TCATCTCAAATTTTTCACTTTATACAG    |
| SIRV2ORF90R-TRUNC | TCAAGAATTATTATCGACAAATTTTTTATC |
| SIRV2ORF109R      | TTATTGACATTTAAATATAAGTCTTG     |
| SIRV2ORF116R      | TTAGGAAATCTTATTAATAGATTTTTTC   |
| SIRV2ORF131aR     | TTAATATCTAGAAATCTCTGG          |
| SIRV2ORF103bR     | TTAGTTTTTTATTAATTTGATCTTATG    |
| SIRV2ORF111R      | TTATTTATTATTATTGTTTATCAAATTCTG |
| SIRV2ORF105aR     | TTAAATATTGTTTTCTTCATCCTC       |
| SIRV2ORF62aR      | TTAAAGAACTTTAATCCTCTTTATTCC    |
| SIRV2ORF102R      | TTAGAAATATAAATTTGTTATCC        |
| SIRV2ORF310R      | TTATATTTCTAATTCTATCTC          |
| SIRV2ORF399R      | CTATTTTGGCATGACATTTATTTTAC     |
| SIRV2ORF56bR      | TTAACCGCCTCGTTTTTGCAAATATTC    |
| SIRV2ORF119cR     | TTATGACATTTTTATATCTTTTTTTTG    |
| SIRV2ORF131bR     | TTAAAACCTCCTCAACTG             |
| SIRV2ORF436R      | TTACCATCCTCCTAAATTGCTAAATC     |
| SIRV2ORF207R      | TTAAAAAAGTGATATAATGCATTTTTG    |
| SIRV2ORF84aR      | TCATTTTAAATCACCATTCCCAGAAAAC   |
| SIRV2ORF59bR      | TCAGAACTTTATTTTCTCAACTTTTG     |
| SIRV2ORF91R       | TCAGACATTTAAATCACCTAAC         |
| SIRV2ORF158bR     | TTAATCTTCTTTTGCTAAAGTTAC       |
| SIRV2ORF103cR     | TCAGTTCTATTTTTCAGTTTCTGAC      |
| SIRV2ORF76R       | TTAGTTAAGCAGATAAGAC            |

|                    |                                  |
|--------------------|----------------------------------|
| SIRV2ORF134R       | TTAACTTACATATCCAGTTGGGCTTC       |
| SIRV2ORF55R        | TTATTCTTCTTCAGCCTTTATTTTC        |
| SIRV2ORF335R       | TCATTCTAAGAATCTAGTATATAAATTTTC   |
| SIRV2ORF156R       | CTAAAGTAAATAAATCGTTACTTTATTTAG   |
| SIRV2ORF64R        | TTACCATAATCCCCATTCTTACTATC       |
| SIRV2ORF84cR       | TCATTTTTTATCTAACCTCC             |
| SIRV2ORF110R       | TCACTCATCTTCACTTTCCTCCTCAG       |
| SIRV2ORF488R       | CTATCTATTTGCAATATTTTGAAAATTC     |
| SIRV2ORF154R       | TCACTTATTAAGATATTTTACATAAACTTC   |
| SIRV2ORF121R       | TTAGCTGTTAATTCCGTATTTAAATTTG     |
| SIRV2ORF69R        | TCATTTTTCTCACCTTCAACTG           |
| SIRV2ORF114R       | TTAGTCTACAATTATCTCAAAAAATTG      |
| SIRV2ORF1070R      | TTAGTAAGCACTTCTTAATTGCC          |
| SIRV2ORF564R       | TCACGCGACATAAATTGTAGTTAATTG      |
| SIRV2ORF309R       | TTATTGACAATTATTATTTATTATTTGTG    |
| SIRV2ORF158aR      | CTATAACTTGCAAATACAAATTCTC        |
| SIRV2ORF269R       | TCATGACTGAACTACCTCAAATAAC        |
| SIRV2ORF269R-TRUNC | TCAAGCATTTATTCCAGTTTTTTGTAATTGTG |
| SIRV2ORF176R       | TTATTTCTCCATTGGAGTTTTTAC         |
| SIRV2ORF356R       | TTAGTTAGTATATTTTTCTACTAC         |
| SIRV2ORF94R        | TTAACTAGATCTCCAAAAATCGATTTTC     |
| SIRV2ORF95R        | TTATCTCTTTTACGAAATAAATC          |
| SIRV2ORF112R       | TTAACTTTCTAAAACAGATTTAACTTG      |
| SIRV2ORF249R       | TTAATCATTTTCTGACCGTCTTGG         |
| SIRV2ORF98R        | TTATTTAGCTTGCGTATTTGGATTTTG      |
| SIRV2ORF73R        | TCACAATTTTTTAGTACGCAATATTTG      |
| SIRV2ORF108R       | TTATCTTGGATATCTAATTAATTG         |
| SIRV2ORF105bR      | TTATGAATTTGAAGTAATTGATTTTTCTAG   |
| SIRV2ORF119bR      | TTAAATATTGTCTTCTTCATCTTC         |
| SIRV2ORF83bR       | CTAACAACTCTCCAAATATCTC           |

**Table S2** SIRV2 gene expression during the infection of *S.islandicus* LAL14/1.

| gp number | GenBank accession number | Name    | t0   | t1     | t2     | t3     | t5     | t7     | t9     |
|-----------|--------------------------|---------|------|--------|--------|--------|--------|--------|--------|
| 1         | NP_666535.1              | ORF83a  | 6062 | 234957 | 114130 | 102725 | 124763 | 122335 | 145288 |
| 2         | NP_666536.1              | ORF119a | 1844 | 18097  | 18415  | 11469  | 10876  | 10111  | 15075  |
| 3         | NP_666537.1              | ORF103a | 1579 | 55032  | 31152  | 22256  | 19755  | 17921  | 21598  |
| 4         | NP_666538.1              | ORF90   | 4    | 507    | 1158   | 1205   | 1289   | 1441   | 2145   |
| 5         | NP_666539.1              | ORF109  | 426  | 7488   | 6345   | 4976   | 5411   | 5708   | 7832   |
| 6         | NP_666540.1              | ORF116  | 7    | 1094   | 1521   | 1460   | 1339   | 1125   | 1256   |
| 7         | NP_666541.1              | ORF131a | 1318 | 20975  | 17605  | 11782  | 10816  | 9846   | 13568  |
| 8         | NP_666542.1              | ORF103b | 881  | 11264  | 6907   | 4864   | 4417   | 4423   | 5649   |
| 9         | NP_666543.1              | ORF111  | 15   | 1415   | 1126   | 644    | 457    | 460    | 708    |
| 10        | NP_666544.1              | ORF105a | 105  | 28146  | 30401  | 24217  | 16604  | 14208  | 14841  |
| 11        | NP_666545.1              | ORF62a  | 32   | 10257  | 14635  | 12437  | 10466  | 7601   | 8116   |
| 12        | NP_666546.1              | ORF102  | 8    | 1851   | 4317   | 3877   | 3743   | 3191   | 3673   |
| 13        | NP_666547.1              | ORF310  | 3    | 466    | 3531   | 5612   | 8494   | 9407   | 11545  |
| 14        | NP_666548.1              | ORF399  | 10   | 2309   | 20762  | 28828  | 39014  | 36691  | 37579  |
| 15        | NP_666549.1              | ORF56b  | 506  | 119860 | 176877 | 133456 | 94962  | 65015  | 74368  |
| 16        | NP_666550.1              | ORF119c | 0    | 31     | 79     | 79     | 110    | 154    | 249    |
| 17        | NP_666551.1              | ORF131b | 98   | 27559  | 34150  | 28102  | 18297  | 12604  | 14973  |
| 18        | NP_666552.1              | ORF436  | 19   | 2846   | 3650   | 2924   | 2843   | 2616   | 3124   |
| 19        | NP_666553.1              | ORF207  | 6    | 1901   | 2803   | 2604   | 3205   | 3503   | 4165   |
| 20        | NP_666554.1              | ORF84a  | 39   | 7712   | 5906   | 3390   | 1892   | 1347   | 1976   |
| 21        | NP_666555.1              | ORF59b  | 50   | 14450  | 10386  | 5819   | 3911   | 3039   | 4725   |
| 22        | NP_666556.1              | ORF91   | 29   | 6406   | 5422   | 2982   | 2246   | 1987   | 3207   |
| 23        | NP_666557.1              | ORF158b | 38   | 7832   | 8260   | 6496   | 5186   | 4419   | 5761   |
| 24        | NP_666558.1              | ORF103c | 16   | 2220   | 2019   | 1444   | 1143   | 1093   | 1468   |
| 25        | NP_666559.1              | ORF76   | 0    | 110    | 108    | 152    | 104    | 154    | 188    |
| 26        | NP_666560.1              | ORF134  | 11   | 1632   | 204021 | 352185 | 500990 | 494474 | 642358 |
| 27        | NP_666561.1              | ORF55   | 15   | 6298   | 9896   | 8268   | 8152   | 9753   | 14292  |
| 28        | NP_666562.1              | ORF335  | 8    | 2326   | 6049   | 6090   | 6034   | 5322   | 5277   |
| 29        | NP_666563.1              | ORF156  | 47   | 9939   | 15146  | 12438  | 12519  | 12339  | 16213  |
| 30        | NP_666564.1              | ORF64   | 3    | 215    | 2754   | 3867   | 5249   | 5859   | 7190   |
| 31        | NP_666565.1              | ORF84c  | 4    | 429    | 5384   | 7465   | 10196  | 10388  | 13808  |
| 32        | NP_666566.1              | ORF110  | 9    | 1719   | 30817  | 40884  | 57344  | 63616  | 82868  |
| 33        | NP_666567.1              | ORF488  | 1    | 43     | 3249   | 4059   | 5243   | 5220   | 6576   |
| 34        | NP_666568.1              | ORF154  | 28   | 6298   | 7481   | 5776   | 3848   | 2620   | 3288   |
| 35        | NP_666569.1              | ORF121  | 60   | 16213  | 35186  | 30426  | 24630  | 20333  | 23433  |
| 36        | NP_666570.1              | ORF69   | 48   | 13629  | 32895  | 32119  | 30890  | 26281  | 26026  |
| 37        | NP_666571.1              | ORF114  | 64   | 12965  | 29720  | 26565  | 30049  | 27729  | 30912  |
| 38        | NP_666572.1              | ORF1070 | 2    | 480    | 10110  | 14126  | 21404  | 24211  | 30762  |
| 39        | NP_666573.1              | ORF564  | 1    | 190    | 3791   | 5621   | 8573   | 9382   | 12388  |
| 40        | NP_666574.1              | ORF309  | 1    | 39     | 780    | 1259   | 1807   | 1924   | 2521   |

|    |             |         |      |        |       |       |        |        |        |
|----|-------------|---------|------|--------|-------|-------|--------|--------|--------|
| 41 | NP_666575.1 | ORF158a | 0    | 269    | 6945  | 9208  | 13972  | 15128  | 19898  |
| 42 | NP_666576.1 | ORF269  | 2    | 446    | 12175 | 14788 | 22518  | 26154  | 31785  |
| 43 | NP_666577.1 | ORF176  | 6    | 857    | 4217  | 4319  | 4684   | 4201   | 4379   |
| 44 | NP_666578.1 | ORF356  | 1    | 545    | 4185  | 4970  | 6543   | 6419   | 6980   |
| 45 | NP_666579.1 | ORF94   | 9    | 2116   | 2588  | 2237  | 1693   | 1291   | 1446   |
| 46 | NP_666580.1 | ORF95   | 28   | 6684   | 7016  | 5738  | 3925   | 2604   | 2470   |
| 47 | NP_666581.1 | ORF112  | 944  | 21650  | 15916 | 11745 | 10063  | 8770   | 13575  |
| 48 | NP_666582.1 | ORF249  | 1477 | 36410  | 35947 | 24487 | 22987  | 22802  | 30834  |
| 49 | NP_666583.1 | ORF98   | 35   | 5141   | 64921 | 94658 | 156902 | 189222 | 239929 |
| 50 | NP_666584.1 | ORF73   | 0    | 291    | 432   | 401   | 448    | 392    | 534    |
| 51 | NP_666585.1 | ORF108  | 332  | 61453  | 49118 | 30234 | 20815  | 14979  | 19408  |
| 52 | NP_666586.1 | ORF105b | 840  | 5937   | 4530  | 2846  | 2818   | 2835   | 4261   |
| 53 | NP_666587.1 | ORF119b | 1525 | 19554  | 17692 | 10939 | 10603  | 11636  | 17028  |
| 54 | NP_666588.1 | ORF83b  | 3031 | 117479 | 57065 | 51363 | 62382  | 61168  | 72644  |

Depicted is the absolute number of reads per kilobase of transcript (RPKM) mapping to each SIRV2 ORF. t=0-t=9, samples harvested 0 to 9 h.p.i.

Table S3

Please see separate excel file.

**Table S4** Expression of CRISPR associated genes in *S.islandicus* LAL14/1 cells challenged with SIRV2 infection.

| operon         | gene      | protein   | t0C   | t0I   | t1C   | t1I   | t2C   | t2I   | t3C   | t3I   | t5C   | t5I   | t7C   | t7I   | t9C   | t9I   |
|----------------|-----------|-----------|-------|-------|-------|-------|-------|-------|-------|-------|-------|-------|-------|-------|-------|-------|
| I-A            | Sil_0385  | Cas6      | 5     | 139   | 147   | 1174  | 137   | 1472  | 143   | 1559  | 108   | 1764  | 110   | 1824  | 151   | 2322  |
|                | Sil_0386  | Casx      | 633   | 813   | 985   | 5799  | 961   | 7399  | 902   | 7353  | 928   | 7878  | 888   | 9011  | 873   | 10969 |
|                | Sil_0387  | HD        | 394   | 503   | 656   | 3530  | 657   | 4566  | 687   | 4936  | 576   | 4896  | 532   | 4976  | 553   | 5341  |
|                | Sil_0388  | Cas3      | 459   | 637   | 761   | 5086  | 801   | 6188  | 812   | 6464  | 770   | 6798  | 745   | 6959  | 745   | 7364  |
|                | Sil_0389  | Cas5      | 787   | 1014  | 1262  | 10618 | 1384  | 13321 | 1448  | 13718 | 1395  | 14072 | 1288  | 13157 | 1248  | 13520 |
|                | Sil_0390  | Csa2      | 1825  | 2304  | 2926  | 26188 | 3168  | 28588 | 3221  | 28211 | 3133  | 28439 | 2896  | 25435 | 2787  | 21752 |
|                | Sil_0391  | Csa5      | 1640  | 2365  | 2561  | 33417 | 2847  | 32729 | 2740  | 32186 | 2662  | 32562 | 2653  | 29023 | 2583  | 24348 |
|                | Sil_0392  | Csa3      | 102   | 115   | 115   | 333   | 121   | 386   | 115   | 379   | 131   | 342   | 113   | 400   | 105   | 395   |
| I-A            | Sil-0993  | Csa3      | 6     | 5     | 8     | 5     | 8     | 11    | 6     | 15    | 2     | 23    | 7     | 20    | 6     | 37    |
|                | Sil-0994  | Cas4      | 14    | 19    | 17    | 75    | 12    | 91    | 16    | 103   | 14    | 77    | 15    | 84    | 14    | 81    |
|                | Sil-0995  | Cas2      | 11    | 25    | 4     | 71    | 29    | 58    | 8     | 57    | 13    | 63    | 12    | 71    | 15    | 83    |
|                | Sil-0996  | Cas1      | 17    | 20    | 13    | 62    | 14    | 70    | 21    | 84    | 15    | 84    | 23    | 85    | 13    | 85    |
|                | Sil-0997  | Csa1      | 5     | 6     | 2     | 7     | 6     | 11    | 6     | 12    | 1     | 10    | 3     | 12    | 2     | 18    |
| III-B $\alpha$ | Sil_0786  | Cmr3      | 763   | 738   | 760   | 406   | 722   | 414   | 716   | 386   | 660   | 379   | 735   | 363   | 730   | 321   |
|                | Sil_0787  | Cmr2      | 669   | 642   | 738   | 323   | 705   | 383   | 703   | 397   | 742   | 411   | 723   | 397   | 699   | 364   |
|                | Sil_0788  | Cmr6      | 891   | 766   | 965   | 398   | 1028  | 507   | 1046  | 540   | 1083  | 617   | 997   | 609   | 1021  | 560   |
|                | Sil_0789  | Cmr1      | 765   | 744   | 884   | 385   | 940   | 485   | 966   | 486   | 989   | 554   | 948   | 567   | 881   | 528   |
|                | Sil_0790  | Cmr5      | 2415  | 2906  | 2987  | 1446  | 3564  | 1867  | 3121  | 1760  | 3508  | 2023  | 3518  | 2225  | 3196  | 2132  |
|                | Sil_0791  | Cmr4      | 902   | 941   | 1035  | 538   | 1194  | 655   | 1211  | 656   | 1253  | 775   | 1226  | 745   | 1107  | 706   |
|                | Sil_0792  | -         | 5     | 0     | 6     | 6     | 3     | 18    | 0     | 24    | 0     | 20    | 0     | 50    | 2     | 43    |
|                | Sil_0793  | csx       | 517   | 562   | 554   | 218   | 573   | 235   | 589   | 206   | 602   | 193   | 585   | 166   | 571   | 135   |
| III-B $\beta$  | Sil_0600  | Cmr3      | 250   | 304   | 307   | 848   | 368   | 1089  | 389   | 1136  | 385   | 1255  | 370   | 1062  | 372   | 1063  |
|                | Sil_0601  | Cmr2      | 192   | 214   | 251   | 441   | 275   | 631   | 281   | 702   | 303   | 758   | 276   | 669   | 294   | 711   |
|                | Sil_0602  | Cmr6      | 75    | 100   | 105   | 217   | 126   | 325   | 128   | 298   | 140   | 375   | 144   | 331   | 140   | 409   |
|                | Sil_0603  | Cmr5      | 557   | 856   | 898   | 1889  | 1153  | 2728  | 979   | 2709  | 1126  | 2770  | 1212  | 3127  | 1305  | 4383  |
|                | Sil_0604  | Cmr1      | 131   | 153   | 186   | 363   | 223   | 533   | 247   | 592   | 244   | 619   | 230   | 599   | 238   | 582   |
| I-D            | Sil_0605  | Cmr4      | 132   | 171   | 215   | 399   | 242   | 665   | 270   | 688   | 282   | 714   | 249   | 654   | 279   | 713   |
|                | Sil_0606  | Cas3      | 143   | 154   | 219   | 1025  | 212   | 2242  | 216   | 3568  | 206   | 4878  | 196   | 5176  | 230   | 4873  |
|                | Sil_0607  | Csc1      | 136   | 161   | 220   | 1226  | 245   | 2643  | 234   | 3792  | 242   | 4912  | 246   | 4849  | 235   | 4665  |
|                | Sil_0608  | Csc2      | 1023  | 1219  | 1856  | 10439 | 2089  | 21157 | 2006  | 27497 | 2137  | 35689 | 2073  | 35991 | 1948  | 32103 |
| I-D            | Sil_0609  | cscA      | 236   | 297   | 317   | 3378  | 393   | 7077  | 378   | 9214  | 418   | 11656 | 422   | 11419 | 348   | 11071 |
|                | Sil_0610  | Csa3      | 36    | 30    | 50    | 191   | 44    | 200   | 40    | 171   | 49    | 135   | 53    | 101   | 28    | 61    |
|                | Sil_0611  | Cas6      | 15    | 18    | 23    | 68    | 33    | 89    | 36    | 75    | 27    | 61    | 22    | 46    | 20    | 38    |
|                | Sil_0612  | Cas1      | 3     | 6     | 6     | 49    | 2     | 64    | 3     | 61    | 7     | 61    | 5     | 65    | 4     | 71    |
| I-D            | Sil_0613  | cscB      | 20    | 19    | 22    | 156   | 26    | 161   | 24    | 188   | 32    | 173   | 24    | 178   | 19    | 192   |
|                | I-A       | CRIS PR-1 | 16972 | 15337 | 15251 | 22509 | 13349 | 27778 | 13972 | 30632 | 14648 | 37093 | 15698 | 41785 | 15249 | 57281 |
|                | I-A       | CRIS PR-2 | 4     | 3     | 5     | 38    | 2     | 51    | 6     | 50    | 1     | 86    | 7     | 65    | 6     | 92    |
|                | III-B     | CRIS PR-3 | 1366  | 1167  | 1312  | 1771  | 1187  | 2323  | 1212  | 2551  | 1345  | 3249  | 1496  | 3589  | 1388  | 5249  |
|                | III-B     | CRIS PR-4 | 1878  | 1674  | 1708  | 2246  | 1589  | 2789  | 1800  | 3278  | 1940  | 4648  | 2229  | 5725  | 2111  | 8443  |
| I-D            | CRIS PR-5 | 1         | 3     | 2     | 20    | 1     | 17    | 1     | 21    | 2     | 21    | 0     | 37    | 4     | 18    |       |

Of each operon are shown the type to which the encoded CRISPR system belongs, as well as the individual gene and protein names of all genes in this operon. CRISPR numbers represent



repeat-spacer arrays. Numbers correspond with those from Fig.5. C, uninfected control samples. I, SIRV2 infected samples. t0-t9, samples harvested 0 to 9 h.p.i.

**Table S5** Predicted toxin and antitoxin genes in the *S.islandicus* LAL14/1 genome.

| <b>Toxin-antitoxin genes</b> |            |         |          |     |           |
|------------------------------|------------|---------|----------|-----|-----------|
| <b>Family II: VapBC like</b> |            |         |          |     |           |
| gene                         | arCOG      | control | infected | FC  |           |
| SiL_2040                     | arCOG00713 | 211     | 943      | 4,5 | toxin     |
| SiL_2041                     | arCOG00815 | 2423    | 5096     | 2,1 | antitoxin |
| SiL_2042                     | arCOG07235 | 298     | 334      | 1,1 | antitoxin |
| SiL_2043                     | arCOG00727 | 34      | 45       | 1,3 | toxin     |
| SiL_2080                     | arCOG00820 | 122     | 148      | 1,2 | antitoxin |
| SiL_2081                     | arCOG06028 | 300     | 412      | 1,4 | toxin     |
| SiL_2134                     | arCOG00815 | 2615    | 8314     | 3,2 | antitoxin |
| SiL_2135                     | arCOG02730 | 1310    | 4746     | 3,6 | toxin     |
| SiL_2176                     | arCOG00729 | 153     | 104      | 0,7 | toxin     |
| SiL_2177                     | arCOG02218 | 636     | 361      | 0,6 | antitoxin |
| SiL_2253                     | arCOG02731 | 173     | 543      | 3,1 | toxin     |
| SiL_2254                     | arCOG00824 | 204     | 626      | 3,1 | antitoxin |
| SiL_2575                     | arCOG02222 | 26      | 87       | 3,3 | toxin     |
| SiL_2576                     | arCOG00818 | 3       | 12       | 3,5 | antitoxin |
| SiL_0190                     | arCOG03845 | 10      | 40       | 4,2 | antitoxin |
| SiL_0382                     | arCOG00818 | 85      | 229      | 2,7 | antitoxin |
| SiL_0383                     | arCOG02221 | 42      | 159      | 3,8 | toxin     |
| SiL_0359                     | arCOG02219 | 352     | 269      | 0,8 | toxin     |
| SiL_0360                     | arCOG08550 | 294     | 188      | 0,6 | antitoxin |
| SiL_0413                     | arCOG02681 | 288     | 676      | 2,3 | antitoxin |
| SiL_0414                     | arCOG02219 | 45      | 135      | 3,0 | toxin     |
| SiL_0431                     | arCOG00726 | 480     | 2403     | 5,0 | toxin     |
| SiL_0432                     | arCOG02217 | 448     | 2325     | 5,2 | antitoxin |
| SiL_0619                     | arCOG00729 | 16      | 60       | 3,9 | toxin     |
| SiL_0620                     | arCOG02218 | 129     | 555      | 4,3 | antitoxin |
| SiL_0631                     | arCOG00727 | 52      | 92       | 1,8 | toxin     |
| SiL_0632                     | arCOG02217 | 109     | 235      | 2,1 | antitoxin |
| SiL_0634                     | arCOG00815 | 140     | 216      | 1,5 | antitoxin |
| SiL_0635                     | arCOG02730 | 51      | 73       | 1,4 | toxin     |
| SiL_0734                     | arCOG07589 | 363     | 1285     | 3,5 | toxin     |
| SiL_0735                     | arCOG08216 | 1333    | 3607     | 2,7 | antitoxin |
| SiL_0914                     | arCOG05414 | 568     | 3151     | 5,5 | antitoxin |
| SiL_0915                     | arCOG03706 | 491     | 3091     | 6,3 | toxin     |
| <b>Family II: HEPN-NT</b>    |            |         |          |     |           |
| SiL_0103                     | arCOG01191 | 292     | 603      | 2,1 | antitoxin |
| SiL_0487                     | arCOG01203 | 198     | 251      | 1,3 | toxin     |
| SiL_0488                     | arCOG01192 | 63      | 134      | 2,1 | antitoxin |
| SiL_0497                     | arCOG03707 | 40      | 88       | 2,2 | antitoxin |
| SiL_0628                     | arCOG02106 | 27      | 97       | 3,6 | toxin     |
| SiL_0629                     | arCOG02109 | 25      | 94       | 3,7 | antitoxin |
| SiL_0651                     | arCOG03721 | 276     | 520      | 1,9 | antitoxin |
| SiL_0772                     | arCOG03721 | 601     | 2013     | 3,3 | antitoxin |
| SiL_0781                     | arCOG03712 | 26      | 107      | 4,1 | antitoxin |
| SiL_0782                     | arCOG01197 | 165     | 246      | 1,5 | toxin     |
| SiL_0783                     | arCOG01191 | 90      | 139      | 1,6 | antitoxin |
| SiL_0784                     | arCOG03712 | 31      | 87       | 2,8 | antitoxin |
| SiL_0795                     | arCOG03712 | 523     | 590      | 1,1 | antitoxin |
| SiL_0798                     | arCOG03721 | 330     | 343      | 1,0 | antitoxin |
| SiL_0885                     | arCOG03721 | 93      | 83       | 0,9 | antitoxin |
| SiL_0925                     | arCOG01197 | 709     | 731      | 1,0 | toxin     |
| SiL_0926                     | arCOG01191 | 121     | 101      | 0,8 | antitoxin |
| SiL_0927                     | arCOG01192 | 8       | 42       | 5,1 | antitoxin |
| SiL_0944                     | arCOG01191 | 255     | 293      | 1,1 | antitoxin |
| SiL_0945                     | arCOG07292 | 146     | 229      | 1,6 | toxin     |
| SiL_0947                     | arCOG01204 | 182     | 249      | 1,4 | toxin     |
| SiL_0948                     | arCOG01191 | 80      | 110      | 1,4 | antitoxin |
| SiL_1888                     | arCOG04066 | 361     | 331      | 0,9 | toxin     |
| SiL_1975                     | arCOG03721 | 1325    | 316      | 0,2 | antitoxin |
| SiL_2312                     | arCOG03712 | 217     | 373      | 1,7 | antitoxin |
| SiL_2474                     | arCOG03721 | 448     | 1019     | 2,3 | antitoxin |
| SiL_2475                     | arCOG03721 | 867     | 1701     | 2,0 | antitoxin |

Of each gene the average amount of reads (given in RPKM) in uninfected control ( C ) and

SIRV2 infected ( I) cells, and their fold change in expression (FC) is depicted. Significantly up (green) or down (red) regulated genes are colour coded in the FC column. TA pairs are show in yellow/orange.
